# Supplementary material
Source: ML conference proceedings conference paper supplement (https://proceedings.mlr.press/v89/neykov19a.html)
Supplement: Supplementary file [file neykov19a-supp.pdf]

## A Auxiliary Results

**Proposition A.1** (Theorem 2.3. Bellec [2018] Restated). Let  $\mathcal{C}$  be a closed convex subset of  $\mathbb{R}^n$ . Suppose one has the model  $\mathbf{O} = \boldsymbol{\theta} + \mathbf{e}$ , and the estimate based on  $\operatorname{argmin}_{\mathbf{v} \in \mathcal{C}} \|\mathbf{O} - \mathbf{v}\|_2^2$  is denoted by  $\widehat{\boldsymbol{\theta}}$ . If for some  $\mathbf{u} \in \mathcal{C}$  there exists  $t_*(\mathbf{u})$  so that the error vector  $\mathbf{e}$  satisfies

$$\sup_{\mathbf{v} \in \mathcal{C}, \|\mathbf{v} - \mathbf{u}\|_2 \leq t_*(\mathbf{u})} \mathbf{e}^\top (\mathbf{v} - \mathbf{u}) \leq \frac{t_*^2(\mathbf{u})}{2} + Ct_*(\mathbf{u})\sqrt{2x},$$

with probability at least  $1 - \exp(-x)$  then

$$\|\widehat{\boldsymbol{\theta}} - \boldsymbol{\theta}\|_2^2 \leq \|\mathbf{u} - \boldsymbol{\theta}\|_2^2 + 2t_*^2(\mathbf{u}) + 4C^2x,$$

with probability at least  $1 - \exp(-x)$ .

**Lemma A.2** (Fano's inequality). Let  $(\Theta, d)$  be a metric space, and  $\{\mathbb{P}_\theta : \theta \in \Theta\}$  be a collection of probability distributions. Then

$$\inf_{\widehat{\theta}} \sup_{\theta \in \Theta} \mathbb{P}_\theta(d^2(\widehat{\theta}, \theta) \geq \varepsilon^2/4) \geq 1 - \frac{\sup_{\theta, \theta' \in T} D_{\text{KL}}(\mathbb{P}_\theta \| \mathbb{P}_{\theta'}) + \log 2}{\log \mathcal{N}(\varepsilon, T, d)},$$

where  $T \subset \Theta$  is a totally bounded set, and  $\mathcal{N}(\varepsilon, T, d)$  is the packing number of  $T$  with respect to  $d$ .

## B Proofs

*Proof of Lemma 2.1.* First note that the solution to (2.2) will always satisfy  $\widehat{p}_0 \geq 0$  and  $\widehat{p}_n \leq 1$  since all  $0 \leq O_i \leq 1$ .

The proof proceeds to show that if for two probabilities  $p_i \leq p_{i+1}$  we have  $O_i \geq O_{i+1}$  it follows that their final estimates are equal, i.e.,  $\widehat{p}_i = \widehat{p}_{i+1}$ . Therefore one clumps  $O_i$  and  $O_{i+1}$  and treats the two probabilities as the same one, and solves a similar problem with less parameters. Since this observation gives raise to the pool adjacent violators algorithm (PAVA) [Mair et al., 2009] for optimizing the loss function (2.1), which is the same algorithm for optimizing (2.2) the two solutions must coincide.

Suppose that indeed we have  $O_i \geq O_{i+1}$  and  $\widehat{p}_i < \widehat{p}_{i+1}$ . We will arrive at a contradiction by showing that one can add and subtract a small  $c$  and increase the loss function. Consider the function

$$c \mapsto O_i \log(\widehat{p}_i + c) + (1 - O_i) \log(1 - \widehat{p}_i - c) + O_{i+1} \log(\widehat{p}_{i+1} - c) + (1 - O_{i+1}) \log(1 - \widehat{p}_{i+1} + c).$$

Taking the derivative with respect to  $c$  yields

$$\frac{O_i}{\widehat{p}_i + c} - \frac{1 - O_i}{1 - \widehat{p}_i - c} - \frac{O_{i+1}}{\widehat{p}_{i+1} - c} + \frac{1 - O_{i+1}}{1 - \widehat{p}_{i+1} + c} \geq 0,$$

if  $c$  is small enough so that  $\hat{p}_i + c \leq \hat{p}_{i+1} - c$ . Hence the function is increasing in  $c$  which is a contradiction. This proves that  $\hat{p}_i = \hat{p}_{i+1}$ . We note that the proof extends to any  $0 \leq O_i \leq 1$ , and even if one has weights, i.e., if one optimizes:

$$\operatorname{argmax} \sum_{i \in [n]} w_i O_i \log p_i + w_i (1 - O_i) \log(1 - p_i);$$

(in this case instead of  $c$  one needs to consider  $c/w_i$  and  $c/w_{i+1}$  respectively, and the regression will also have weights).

The fact that (2.3) holds<sup>2</sup> is well known [see Chapter 1 of Robertson et al.].  $\square$

*Proof of Theorem 2.3.* We will use Proposition A.1. We need to control the tails of the process:

$$Z = \sup_{\mathbf{v} \in \mathcal{S}_n^\dagger, \|\mathbf{v} - \mathbf{u}\|_2 \leq t} \sum_{i \in [n]} (O_i - p_i)(v_i - u_i).$$

We will first argue that  $Z$  is close to its expected value, using Theorem 6.7 [Boucheron et al., 2013], and in the second step we will control the expected value of  $Z$ . To this end define

$$Z_j = \inf_{o_j \in \{0,1\}} \sup_{\mathbf{v} \in \mathcal{S}_n^\dagger, \|\mathbf{v} - \mathbf{u}\|_2 \leq t} \sum_{i \neq j} (O_i - p_i)(v_i - u_i) + (o_j - p_j)(v_j - u_j),$$

and note that

$$(Z - Z_j)^2 \leq (v_j^* - u_j)^2,$$

where  $\mathbf{v}^*$  denotes the value where the  $\sup_{\mathbf{v} \in \mathcal{S}_n^\dagger, \|\mathbf{v} - \mathbf{u}\|_2 \leq t} \sum_{i \in [n]} (O_i - p_i)(v_i - u_i)$  is attained (the sup is attained since the set  $\mathcal{S}_n^\dagger \cap \{\mathbf{v} : \|\mathbf{v} - \mathbf{u}\|_2 \leq t\}$  is compact). It therefore follows that

$$\sum_{i \in [n]} (Z - Z_i)^2 \leq \sum_{i \in [n]} (v_i^* - u_i)^2 \leq t^2.$$

By Theorem 6.7 [Boucheron et al., 2013] we have

$$\mathbb{P}(Z \geq \mathbb{E}Z + y) \leq e^{-y^2/2t^2},$$

and hence setting  $y = \sqrt{2xt}$  we obtain that with probability at least  $1 - e^{-x}$  we have

$$Z \leq \mathbb{E}Z + \sqrt{2xt}.$$

Next, using symmetrization as in the proof of Theorem 2.2 we obtain

$$\begin{aligned} \mathbb{E}Z &\leq 2\mathbb{E}\varepsilon \sup_{\mathbf{v} \in \mathcal{S}_n^\dagger, \|\mathbf{v} - \mathbf{u}\|_2 \leq t} \sum_{i \in [n]} \varepsilon_i (v_i - u_i) \\ &\leq \sqrt{2\pi} \mathbb{E}\xi \sup_{\mathbf{v} \in \mathcal{S}_n^\dagger, \|\mathbf{v} - \mathbf{u}\|_2 \leq t} \sum_{i \in [n]} \xi_i (v_i - u_i), \end{aligned} \quad (\text{B.1})$$

<sup>2</sup>(2.3) holds for unweighted regression only

where  $\xi$  is a standard Gaussian random vector. In Chatterjee et al. [2014] it is proved that the above quantity is  $\leq t^2/16$  for values of  $t \geq c(1 + V(\mathbf{u}))^{1/3}n^{1/6}$ . This completes the proof by Proposition A.1.  $\square$

*Proof of Theorem 2.4.* Our proof will follow the proof of Theorem 2.2 of Guntuboyina and Sen [2017] where modifications are needed since the errors are not i.i.d. Gaussian as required in the original statement. First note that the second inequality follows from the first by a simple application of Jensen's inequality, hence we focus on showing the first inequality. We note that by Lemma 2.1, and any integer  $k$

$$\begin{aligned} \hat{p}_j &= \min_{v \geq j} \max_{u \leq j} \bar{O}_{uv} \leq \max_{u \leq j} (\bar{p}_{u,j+k} + \bar{O}_{u,j+k} - \bar{p}_{u,j+k}) \\ &\leq \bar{p}_{j,j+k} + \max_{u \leq j} (\bar{O}_{u,j+k} - \bar{p}_{u,j+k}), \end{aligned}$$

where the last inequality follows by the monotonicity of  $\mathbf{p}$ . Hence

$$\hat{p}_j - p_j \leq (\bar{p}_{j,j+k} - p_j) + \max_{u \leq j} (\bar{O}_{u,j+k} - \bar{p}_{u,j+k}),$$

which implies

$$\begin{aligned} \mathbb{E}(\hat{p}_j - p_j)_+^p &\leq \mathbb{E}((\bar{p}_{j,j+k} - p_j) \\ &\quad + \max_{u \leq j} (\bar{O}_{u,j+k} - \bar{p}_{u,j+k}))_+^p, \end{aligned}$$

Now let  $N_1, N_2, \dots, N_m$  denote the indices of the  $m$  different equal probabilities. Take  $j \in N_k$ , and let there be  $l_k$  numbers to the left of  $j$  and  $r_k$  numbers to the right of  $j$  in  $N_k$  (i.e.  $\max_{i \in N_k} i = j + r_k$ ,  $\min_{i \in N_k} i = j - l_k$ ). Note that since all probabilities on  $N_k$  are the same we have  $\bar{p}_{j,j+r_k} = p_j$  and therefore

$$\mathbb{E}(\hat{p}_j - p_j)_+^p \leq \mathbb{E}(\max_{u \leq j} (\bar{O}_{u,j+r_k} - \bar{p}_{u,j+r_k}))_+^p.$$

Here it is necessary for the proof to depart substantially from the original argument as the sequence  $(\bar{O}_{u,j+r_k} - \bar{p}_{u,j+r_k})$  does not have the required i.i.d. structure. We start by symmetrizing the function similarly to the proof of Theorem 2.2. Let  $\tilde{O}_i$  be i.i.d. copies of  $O_i$ . Note that since  $(\cdot)_+^p$  is convex we have

$$\begin{aligned} &\mathbb{E}(\max_{u \leq j} (\bar{O}_{u,j+r_k} - \bar{p}_{u,j+r_k}))_+^p \\ &= \mathbb{E}\mathbf{O} \left( \max_{u \leq j} \frac{\sum_{i=u}^{j+r_k} (O_i - \mathbb{E}\tilde{O}_i)}{j + r_k - u + 1} \right)_+^p \\ &\leq \mathbb{E}\mathbf{O}, \tilde{\mathbf{O}} \left( \max_{u \leq j} \frac{\sum_{i=u}^{j+r_k} (O_i - \tilde{O}_i)}{j + r_k - u + 1} \right)_+^p, \end{aligned}$$

where the last expectation is taken with respect to both  $O_i$  and  $\tilde{O}_i$ . We can introduce random sign  $\varepsilon_i$  since the

distributions  $O_i - \tilde{O}_i$  are symmetric.

$$\begin{aligned} & \mathbb{E}(\max_{u \leq j} (\bar{O}_{u,j+r_k} - \bar{p}_{u,j+r_k}))_+^p \\ & \leq \mathbb{E}_{\mathbf{O}, \tilde{\mathbf{O}}} \left( \max_{u \leq j} \frac{\sum_{i=u}^{j+r_k} \varepsilon_i (O_i - \tilde{O}_i)}{j+r_k-u+1} \right)_+^p \\ & = \mathbb{E}_{\mathbf{O}, \tilde{\mathbf{O}}, \varepsilon} \left( \max_{u \leq j} \frac{\sum_{i=u}^{j+r_k} \varepsilon_i (O_i - \tilde{O}_i)}{j+r_k-u+1} \right)_+^p, \quad (\text{B.2}) \end{aligned}$$

where in the last equality the expectation is taken with respect to the  $\varepsilon_i$  as well. Using the convexity of  $(\cdot)_+^p$ , the properties of max and sign symmetry we obtain

$$\begin{aligned} & \mathbb{E}(\max_{u \leq j} (\bar{O}_{u,j+r_k} - \bar{p}_{u,j+r_k}))_+^p \\ & \leq \mathbb{E}_{\mathbf{O}, \varepsilon} \left( 2 \max_{u \leq j} \frac{\sum_{i=u}^{j+r_k} \varepsilon_i O_i}{j+r_k-u+1} \right)_+^p \\ & \leq \mathbb{E}_{\varepsilon} \left( 2 \max_{u \leq j} \frac{\sum_{i=u}^{j+r_k} \varepsilon_i}{j+r_k-u+1} \right)_+^p. \end{aligned}$$

where in the last inequality we used the contraction principle (Theorem 11.6 [Boucheron et al. \[2013\]](#)). Importantly, note that the sequence of random variables (indexed by  $u$ )  $\frac{\sum_{i=u}^{j+r_k} \varepsilon_i}{j+r_k-u+1}$  forms a martingale.

Consider first the case  $1 < p < 2$ . By Doob's  $L^p$  maximal inequality for submartingales [[Mörters and Peres, 2010](#)] (which holds for  $p > 1$ ) and Khintchine's inequality we have

$$\begin{aligned} & \mathbb{E}_{\varepsilon} \left( 2 \max_{u \leq j} \frac{\sum_{i=u}^{j+r_k} \varepsilon_i}{j+r_k-u+1} \right)_+^p \\ & \leq 2^p \left( \frac{p}{p-1} \right)^p \mathbb{E}_{\varepsilon} \left( \frac{\sum_{i=j}^{j+r_k} \varepsilon_i}{r_k+1} \right)_+^p \\ & \leq 2^p \left( \frac{p}{p-1} \right)^p B_p^p \left( \frac{1}{r_k+1} \right)^{p/2}, \end{aligned}$$

where  $B_p$  is the upper constant from Khintchine's inequality. Therefore we conclude that:

$$\mathbb{E}(\hat{p}_j - p_j)_+^p \leq 2^p \left( \frac{p}{p-1} \right)^p B_p^p \frac{1}{(r_k+1)^{p/2}}.$$

Using similar arguments one can also argue that

$$\mathbb{E}(\hat{p}_j - p_j)_-^p \leq 2^p \left( \frac{p}{p-1} \right)^p B_p^p \frac{1}{(l_k+1)^{p/2}}.$$

Combining the two inequalities above and summing over all  $j$  we have

$$\begin{aligned} \mathbb{E} \sum_{j \in [n]} (\hat{p}_j - p_j)^p & \leq 2^{p+1} \left( \frac{p}{p-1} \right)^p B_p^p \sum_{k=1}^m \sum_{j \in [N_k]} \left( \frac{1}{j} \right)^{p/2} \\ & \leq C_p \sum_{k=1}^m \frac{2}{2-p} |N_k|^{1-p/2}, \end{aligned}$$

which is what we wanted to show for the case  $1 < p < 2$  (the last bound follows by simple integration).

When  $p = 1$ , Doob's maximal  $L^p$  inequality does not hold, and we need to slightly change the argument. We have

$$\begin{aligned} & \mathbb{E}_{\varepsilon} 2 \left( \max_{u \leq j} \frac{\sum_{i=u}^{j+r_k} \varepsilon_i}{j+r_k-u+1} \right)_+ \\ & \leq \tau + \int_{\tau}^{\infty} \mathbb{P}_{\varepsilon} \left( 2 \max_{u \leq j} \left( \frac{\sum_{i=u}^{j+r_k} \varepsilon_i}{j+r_k-u+1} \right)_+ \geq t \right) dt, \end{aligned}$$

where we set  $\tau = \sqrt{\frac{1}{r_k+1}}$ . Since  $\left( \frac{\sum_{i=u}^{j+r_k} \varepsilon_i}{j+r_k-u+1} \right)_+$  is a submartingale (as a convex function of a martingale) Doob's weak maximal inequality [[Mörters and Peres, 2010](#)] gives

$$\begin{aligned} & \mathbb{P}_{\varepsilon} \left( 2 \max_{u \leq j} \left( \frac{\sum_{i=j}^{j+r_k} \varepsilon_i}{j+r_k-u+1} \right)_+ \geq t \right) \\ & \leq \frac{\mathbb{E}_{\varepsilon} \left( 2 \left( \frac{\sum_{i=j}^{j+r_k} \varepsilon_i}{r_k+1} \right)_+ \mathbb{1} \left( 2 \max_{u \leq j} \left( \frac{\sum_{i=u}^{j+r_k} \varepsilon_i}{j+r_k-u+1} \right)_+ \geq t \right) \right)}{t}. \end{aligned}$$

We square the preceding display and apply Cauchy-Schwartz, followed by an application of Khintchine's inequality to obtain

$$\begin{aligned} & \mathbb{P}_{\varepsilon} \left( 2 \max_{u \leq j} \left( \frac{\sum_{i=j}^{j+r_k} \varepsilon_i}{j+r_k-u+1} \right)_+ \geq t \right) \\ & \leq \frac{4 \mathbb{E}_{\varepsilon} \left( \frac{\sum_{i=j}^{j+r_k} \varepsilon_i}{r_k+1} \right)_+^2}{t^2} \leq \frac{4B_2^2 \frac{1}{r_k+1}}{t^2} = \frac{4B_2^2 \tau^2}{t^2}. \end{aligned}$$

Changing variables yields:

$$\begin{aligned} & \mathbb{E}_{\varepsilon} \left( 2 \max_{u \leq j} \frac{\sum_{i=u}^{j+r_k} \varepsilon_i}{j+r_k-u+1} \right)_+ \\ & \leq \tau + 4B_2^2 \tau \int_1^{\infty} \frac{1}{t^2} dt = (1 + 4B_2^2) \tau. \end{aligned}$$

The rest of the proof goes through.  $\square$

**Lemma B.1.** The KL divergence between  $P = \text{Ber}(p)$  and  $Q = \text{Ber}(p+c)$  (for some  $0 < |c| < \min(p, 1-p)$ ) is bounded as

$$\left| D_{\text{KL}}(P||Q) - \frac{c^2}{p(1-p)} \right| \leq \frac{|c|^3}{p(1-p)(1-p-|c|)(p-|c|)}.$$

*Proof of Lemma B.1.* The proof is a simple calculation

which we include for completeness.

$$\begin{aligned}
 D_{\text{KL}}(P||Q) &= -p \log \left(1 + \frac{c}{p}\right) - (1-p) \log \left(1 - \frac{c}{1-p}\right) \\
 &= p \sum_{i=1}^{\infty} (-1)^i i^{-1} \left(\frac{c}{p}\right)^i + (1-p) \sum_{i=1}^{\infty} i^{-1} \left(\frac{c}{1-p}\right)^i \\
 &= \frac{c^2}{p(1-p)} + c \sum_{i \geq 3} \left[ (-1)^i i^{-1} \left(\frac{c}{p}\right)^{i-1} + i^{-1} \left(\frac{c}{1-p}\right)^{i-1} \right].
 \end{aligned}$$

It immediately follows that

$$\begin{aligned}
 &\left| D_{\text{KL}}(P||Q) - \frac{c^2}{p(1-p)} \right| \\
 &\leq |c| \sum_{i \geq 3} \left[ \left(\frac{|c|}{p}\right)^{i-1} + \left(\frac{|c|}{1-p}\right)^{i-1} \right] \\
 &= \frac{|c|^3}{p^2(1-\frac{|c|}{p})} + \frac{|c|^3}{(1-p)^2(1-\frac{|c|}{1-p})} \\
 &\leq \frac{|c|^3}{p(1-p)(1-p-|c|)(p-|c|)}.
 \end{aligned}$$

□

*Proof of Proposition 2.5.* For simplicity suppose that  $n/m = k \in \mathbb{N}$ . Fix a small  $0 < \delta < 1$  and take the following base probability vector:

$$p_i = \delta + \alpha \lfloor (i-1)/k \rfloor,$$

for  $i \in [n]$ , where  $\alpha = \frac{1-5/2\delta}{m-1}$ . In this way  $p_1 = \delta$  and  $p_n = 1 - 3/2\delta$ . Using the Varshamov-Gilbert Lemma [Tsybakov, 2009] construct a sequence on the cube  $\{0, 1\}^m$ :  $\mathcal{W} = \{\mathbf{w}_i\}_{i \in 0, 1, \dots, M}$  such that  $d_{\text{H}}(\mathbf{w}_i, \mathbf{w}_j) \geq \frac{m}{8}$  and  $\log M \geq \frac{m}{8}$ , where  $d_{\text{H}}$  denotes the Hamming distance. We perturb the probability vector  $\mathbf{p}$  by adding  $c\mathbf{w}$  for  $\mathbf{w} \in \mathcal{W}$  to the corresponding coordinates:

$$p_i^{\mathbf{w}} = p_i + cw_{\lfloor (i-1)/k \rfloor + 1},$$

where  $c < \alpha \wedge \frac{\delta}{2}$  and therefore keeps the relationship  $p_i^{\mathbf{w}} \leq p_j^{\mathbf{w}}$  for  $i \leq j$ . For any two  $\mathbf{w}$  and  $\mathbf{w}'$  and  $1 < p \leq 2$  we have the following bound

$$\frac{1}{n} \|\mathbf{p}^{\mathbf{w}} - \mathbf{p}^{\mathbf{w}'}\|_p^p \geq d_{\text{H}}(\mathbf{w}, \mathbf{w}') c^p \frac{k}{n} \geq \frac{c^p}{8}.$$

Next, using Lemma B.1 the maximum KL divergence between vector valued Bernoulli random variables with probabilities equal to  $\mathbf{p}^{\mathbf{w}}$  and  $\mathbf{p}^{\mathbf{w}'}$  is bounded as

$$\begin{aligned}
 &D_{\text{KL}}(\text{Ber}(\mathbf{p}^{\mathbf{w}})||\text{Ber}(\mathbf{p}^{\mathbf{w}'})) \\
 &\leq d_{\text{H}}(\mathbf{w}, \mathbf{w}') k \frac{c^2}{\delta(1-\delta)} \left(1 + \frac{2c}{(1-2\delta)\delta}\right) \\
 &\leq d_{\text{H}}(\mathbf{w}, \mathbf{w}') k \frac{2c^2}{\delta(1-2\delta)} \leq \frac{2nc^2}{\delta(1-2\delta)}.
 \end{aligned}$$

Using Fano's inequality (Lemma A.2) in conjunction with Markov's inequality we obtain the lower bound

$$\inf_{\hat{\mathbf{p}}} \sup_{\mathbf{p}} \mathbb{E} \frac{1}{n} \|\hat{\mathbf{p}} - \mathbf{p}\|_p^p \geq \frac{c^p}{16} \left(1 - \frac{16nc^2}{\delta(1-2\delta)m}\right),$$

which is what we wanted to show after selecting  $c = \sqrt{\frac{\delta(1-2\delta)m}{32n}}$ . □

*Proof of Proposition 2.6.* As in the proof of Theorem 2.2 we need to project onto the tangent cone  $\mathcal{T}_{S_n^\dagger}(\mathbf{u})$ . The proof relies on symmetrization and the contraction principle. Decompose the  $i^{\text{th}}$  of the  $n$  binomials to sums  $k\bar{O}_i = \sum_{j \in [k]} O_{ij}$  where  $O_{ij} \sim \text{Ber}(p_i)$ . We need to control the quantity

$$\mathbb{E}_{\mathbf{O}} \left[ \sup_{\mathbf{t} \in S_l^\dagger, \|\mathbf{t}\|_2 \leq 1} \sum_{i \in [l]} \frac{\sum_{j \in [k]} (O_{ij} - p_i)}{k} t_i \right]^2,$$

where using a slight abuse of notation we refer to  $S_{|N_l|}^\dagger$  with  $S_l^\dagger$  for brevity. Just as in Theorem 2.2, using symmetrization we obtain the following bound:

$$4\mathbb{E}_{\mathbf{O}} \mathbb{E}_{\varepsilon} \left[ \sup_{\mathbf{t} \in S_l^\dagger, \|\mathbf{t}\|_2 \leq 1} \sum_{i \in [l]} \frac{\sum_{j \in [k]} \varepsilon_{ij} O_{ij}}{k} t_i \right]^2.$$

Using the contraction principle (Theorem 11.6 Boucheron et al. [2013]) we get

$$\begin{aligned}
 &\mathbb{E}_{\mathbf{O}} \mathbb{E}_{\varepsilon} \left[ \sup_{\mathbf{t} \in S_l^\dagger, \|\mathbf{t}\|_2 \leq 1} \sum_{i \in [l]} \frac{\sum_{j \in [k]} \varepsilon_{ij} O_{ij}}{k} t_i \right]^2 \\
 &\leq 4\mathbb{E}_{\varepsilon} \left[ \sup_{\mathbf{t} \in S_l^\dagger, \|\mathbf{t}\|_2 \leq 1} \sum_{i \in [l]} \frac{\sum_{j \in [k]} \varepsilon_{ij}}{\sqrt{k}} t_i \right]^2 \frac{1}{k}
 \end{aligned}$$

Just as in the proof of Theorem 2.2 we can now substitute the Rademacher random variables with Gaussians:

$$\begin{aligned}
 &\mathbb{E}_{\varepsilon} \left[ \sup_{\mathbf{t} \in S_l^\dagger, \|\mathbf{t}\|_2 \leq 1} \sum_{i \in [l]} \frac{\sum_{j \in [k]} \varepsilon_{ij}}{\sqrt{k}} t_i \right]^2 \\
 &\leq \frac{\pi}{2} \mathbb{E}_{\varepsilon} \left[ \sup_{\mathbf{t} \in S_l^\dagger, \|\mathbf{t}\|_2 \leq 1} \sum_{i \in [l]} \frac{\sum_{j \in [k]} \xi_{ij}}{\sqrt{k}} t_i \right]^2 = \frac{\pi}{2} \sum_{i \in [l]} \frac{1}{i},
 \end{aligned}$$

where the last equality is well known [see Amelunxen et al., 2014, e.g.]. This completes the proof after applying Lemma 2.10. □

*Proof of Proposition 2.8.* The proof follows closely that of Theorem 2.3 hence we only sketch it. We need to control the tails of the process:

$$Z = \sup_{\mathbf{v} \in S_n^\dagger, \|\mathbf{v} - \mathbf{u}\|_2 \leq t} \sum_{i \in [n]} \frac{\sum_j O_{ij} - p_i}{k} (v_i - u_i).$$

We will first argue that  $Z$  is close to its expected value, using Theorem 6.7 [Boucheron et al. \[2013\]](#), and in the second step we will control the expected value of  $Z$ . To this end define

$$Z_{rs} = \inf_{o_{rs} \in \{0,1\}} \sup_{\substack{\mathbf{v} \in \mathcal{S}_n^\uparrow, \\ \|\mathbf{v} - \mathbf{u}\|_2 \leq t}} \sum_{i,j:(i,j) \neq (r,s)} \frac{\sum_j O_{ij} - p_i}{k} (v_i - u_i) + \frac{(o_{rs} - p_s)(v_s - u_s)}{k},$$

and note that

$$(Z - Z_{rs})^2 \leq \frac{(v_s^* - u_s)^2}{k^2},$$

where  $\mathbf{v}^*$  denotes the value where the  $\sup_{\mathbf{v} \in \mathcal{S}_n^\uparrow, \|\mathbf{v} - \mathbf{u}\|_2 \leq t} \sum_{i \in [n]} \frac{\sum_j O_{ij} - p_i}{k} (v_i - u_i)$  is attained. It therefore follows that

$$\sum_{r,s} (Z - Z_{rs})^2 \leq \sum_{r,s} \frac{(v_s^* - u_s)^2}{k^2} \leq \frac{t^2}{k}.$$

By Theorem 6.7 [Boucheron et al. \[2013\]](#) it follows that

$$\mathbb{P}(Z \geq \mathbb{E}Z + y) \leq e^{-ky^2/2t^2},$$

and hence setting  $y = \sqrt{2xt}$  we obtain that with probability at least  $1 - e^{-x}$  we have

$$Z \leq \mathbb{E}Z + \sqrt{2x/kt}.$$

Next, using symmetrization and changing to Gaussian variables

$$\mathbb{E}Z \leq \frac{\sqrt{2\pi}}{\sqrt{k}} \mathbb{E}_{\boldsymbol{\xi}} \sup_{\mathbf{v} \in \mathcal{S}_n^\uparrow, \|\mathbf{v} - \mathbf{u}\|_2 \leq t} \sum_{i \in [n]} \xi_i (v_i - u_i), \quad (\text{B.3})$$

where  $\boldsymbol{\xi}$  is a standard Gaussian random vector. In [Chatterjee et al. \[2014\]](#) it is proved that the above quantity is  $\leq t^2/16$  for values of  $t \geq c \frac{1}{\sqrt{k}} (1 + V(\mathbf{u})\sqrt{k})^{1/3} n^{1/6}$ . This completes the proof by Proposition [A.1](#).  $\square$

*Proof of Lemma 3.1.* We have the following identity

$$\operatorname{argmin}_{\boldsymbol{\beta}} \mathbb{E}(Y - \mathbf{X}^\top \boldsymbol{\beta})^2 = \operatorname{argmax}_{\boldsymbol{\beta}} 2\mathbb{E}Y \mathbf{X}^\top \boldsymbol{\beta} - \|\boldsymbol{\beta}\|_2^2.$$

Recall that  $\|\boldsymbol{\beta}^*\|_2 = 1$  and represent  $\boldsymbol{\beta} = c\boldsymbol{\beta}^* + \boldsymbol{\beta}^\perp$  where  $\boldsymbol{\beta}^{*\top} \boldsymbol{\beta}^\perp = 0$ . By the properties of the normal distribution we have

$$\mathbb{E}Y \mathbf{X}^\top \boldsymbol{\beta}^\perp = \mathbb{E}Y \mathbb{E} \mathbf{X}^\top \boldsymbol{\beta}^\perp = 0.$$

Therefore by the Pythagorean theorem

$$\begin{aligned} \operatorname{argmax}_{\boldsymbol{\beta}} 2c\mathbb{E}Y \mathbf{X}^\top \boldsymbol{\beta}^* - (c^2 + \|\boldsymbol{\beta}^\perp\|_2^2) \\ \leq \operatorname{argmax}_{\boldsymbol{\beta}} 2c\mathbb{E}Y \mathbf{X}^\top \boldsymbol{\beta}^* - c^2. \end{aligned}$$

The above parabola is maximized at  $c = c_0 = \mathbb{E}Y \mathbf{X}^\top \boldsymbol{\beta}^*$ , and therefore the population minimizer of the least squares satisfies (3.3). Using Chebyshev's association inequality [[Boucheron et al., 2013](#)] it is not hard to see that when  $f$  is strictly monotone increasing and  $Y$  is given by (3.1) we have

$$\begin{aligned} c_0 &= \mathbb{E}Y \mathbf{X}^\top \boldsymbol{\beta}^* = \mathbb{E}f(\mathbf{X}^\top \boldsymbol{\beta}^*) \mathbf{X}^\top \boldsymbol{\beta}^* \\ &> \mathbb{E}f(\mathbf{X}^\top \boldsymbol{\beta}^*) \mathbb{E} \mathbf{X}^\top \boldsymbol{\beta}^* = 0, \end{aligned}$$

and therefore  $\operatorname{argmin}_{\boldsymbol{\beta}} \mathbb{E}(Y - \mathbf{X}^\top \boldsymbol{\beta})^2 = c_0 \boldsymbol{\beta}^*$  is proportional to  $\boldsymbol{\beta}^*$  with  $c_0 > 0$ .  $\square$

**Lemma B.2.** Suppose that  $n_{p,s} = o(1)$ ,  $n_{p,s} \gtrsim \frac{\mathbb{E}(Y - c_0 \mathbf{X}^\top \boldsymbol{\beta}^*)^2}{\lambda^2 s}$  for a sufficiently large constant and  $\mathbb{E}Y^4 < \infty$ . Then the solution  $\tilde{\boldsymbol{\beta}}$  coincides with the solution:

$$\tilde{\boldsymbol{\beta}}_S = \operatorname{argmin}_{\boldsymbol{\beta}_S \in \mathbb{R}^s} \frac{1}{2n} \|\mathbf{Y} - \mathbf{X}_S \boldsymbol{\beta}_S\|_2^2 + \lambda \|\boldsymbol{\beta}_S\|_1,$$

where  $S = \operatorname{supp}(\boldsymbol{\beta}^*)$  (i.e., the set of non-zero coefficients of  $\boldsymbol{\beta}^*$ ) with high probability (i.e. at least .99). Moreover we have

$$\|\hat{\boldsymbol{\beta}} - \boldsymbol{\beta}^*\|_2 \lesssim \sqrt{s} \lambda + n_{p,s}^{-\frac{1}{2}},$$

with overwhelming probability.

*Proof of Lemma B.2.* Theorem 2.3.4 i. of [Neykov et al. \[2016\]](#) shows that under  $n_{p,s} \gtrsim \frac{\mathbb{E}(Y - c_0 \mathbf{X}^\top \boldsymbol{\beta}^*)^2}{\lambda^2 s}$  our first claim follows. We therefore focus on showing our second claim below. Define

$$\mathbf{w} := \mathbf{Y} - c_0 \mathbf{X} \boldsymbol{\beta}^* = \mathbf{Y} - c_0 \mathbf{X}_S \boldsymbol{\beta}_S^*.$$

Furthermore define the quantities:

$$\begin{aligned} \theta^2 &:= \operatorname{Var}\{(Y - c_0 \mathbf{X}^\top \boldsymbol{\beta}^*)^2\}, \quad \gamma^2 := \operatorname{Var}(Y \mathbf{X}^\top \boldsymbol{\beta}^*), \\ \xi^2 &:= \mathbb{E}\{(Y - c_0 \mathbf{X}^\top \boldsymbol{\beta}^*)^2\}. \end{aligned}$$

Notice that the above quantities are well defined since  $\mathbb{E}Y^4 < \infty$  by assumption. We will now show that the vector  $\tilde{\boldsymbol{\beta}}_S$  is close to  $\boldsymbol{\beta}_S^*$  in Euclidean distance. We start by using the inequality:

$$\begin{aligned} \frac{1}{2n} \|\mathbf{Y} - \mathbf{X}_S \tilde{\boldsymbol{\beta}}_S\|_2^2 + \lambda \|\tilde{\boldsymbol{\beta}}_S\|_1 \\ \leq \frac{1}{2n} \|\mathbf{Y} - c_0 \mathbf{X}_S \boldsymbol{\beta}_S^*\|_2^2 + \lambda \|c_0 \boldsymbol{\beta}_S^*\|_1. \end{aligned}$$

Expanding the norms leads to

$$\begin{aligned} \frac{1}{2n} \|\mathbf{X}_S(c_0 \boldsymbol{\beta}_S^* - \tilde{\boldsymbol{\beta}}_S)\|_2^2 + \lambda \|\tilde{\boldsymbol{\beta}}_S\|_1 \\ \leq \frac{1}{n} \mathbf{w}^\top \mathbf{X}_S (\tilde{\boldsymbol{\beta}}_S - c_0 \boldsymbol{\beta}_S^*) + \lambda \|c_0 \boldsymbol{\beta}_S^*\|_1 \\ \leq \frac{1}{n} \|\mathbf{w}^\top \mathbf{X}_S\|_\infty \|c_0 \boldsymbol{\beta}_S^* - \tilde{\boldsymbol{\beta}}_S\|_1 + \lambda \|c_0 \boldsymbol{\beta}_S^*\|_1 \end{aligned} \quad (\text{B.4})$$

The vector  $\mathbf{w}^\top \mathbf{X}_S$  is mean 0. We will now control  $n^{-1} \|\mathbf{w}^\top \mathbf{X}_S\|_\infty$ . We have

$$\begin{aligned} n^{-1} \|\mathbf{w}^\top \mathbf{X}_S\|_\infty &\leq n^{-1} \|\mathbf{P}_{\beta_S^*} \mathbf{X}_S^\top \mathbf{w}\|_\infty \\ &\quad + n^{-1} \|\beta_S^* \beta_S^{*\top} \mathbf{X}_S^\top \mathbf{w}\|_\infty, \end{aligned} \quad (\text{B.5})$$

where  $\mathbf{P}_{\beta_S^*} = \mathbf{I}_s - \beta_S^* \beta_S^{*\top}$ . Note that  $\mathbf{P}_{\beta_S^*} \mathbf{X}_S$  and  $\mathbf{w}$  are independent. It is simple to check that conditionally on  $\mathbf{w}$  the vector  $n^{-1} \mathbf{P}_{\beta_S^*} \mathbf{X}_S^\top \mathbf{w} \sim \mathcal{N}(0, \mathbf{P}_{\beta_S^*} n^{-2} \|\mathbf{w}\|_2^2)$ . We now argue that the term  $n^{-1} \|\mathbf{w}\|_2^2 \leq 2\xi^2$  with probability at least  $1 - \frac{\theta^2}{n\xi^2}$ . Since  $\mathbf{w} = \mathbf{Y} - c_0 \mathbf{X}_S \beta_S^*$  is a vector with non-zero mean. However, by Chebyshev's inequality we have:

$$\mathbb{P}\left(\left|\frac{\|\mathbf{w}\|_2^2}{n} - \xi^2\right| \geq t\right) \leq \frac{\theta^2}{nt^2}.$$

Then setting  $t = \xi^2$  brings the above probability to 0 at a rate  $\frac{\theta^2}{n\xi^4}$ . Next, conditioning on this event it follows that the diagonal entries of the covariance matrix  $n^{-2} \|\mathbf{w}\|_2^2 \mathbf{P}_{\beta_S^*}$  are less than  $n^{-2} \|\mathbf{w}\|_2^2 \leq \frac{2\xi^2}{n}$ . Hence by a standard Gaussian tail bound, on the event  $n^{-1} \|\mathbf{w}\|_2^2 \leq 2\xi^2$  we have that

$$\mathbb{P}(n^{-1} \|\mathbf{P}_{\beta_S^*} \mathbf{X}_S^\top \mathbf{w}\|_\infty \geq t) \leq 2se^{-\bar{c}nt^2/\xi^2},$$

for some universal constant  $\bar{c}$ . Therefore setting  $t \geq \sqrt{\frac{2\xi^2 \log p}{\bar{c}n}}$  bounds the above probability by  $\frac{2s}{p^2} \leq 2p^{-1}$ . We now move to the second term of (B.5). Since  $\|\beta_S^*\|_\infty \leq \|\beta_S^*\|_2 \leq 1$  we have

$$n^{-1} \|\beta_S^* \beta_S^{*\top} \mathbf{X}_S^\top \mathbf{w}\|_\infty \leq n^{-1} \|\beta_S^{*\top} \mathbf{X}_S^\top \mathbf{w}\|_\infty.$$

Next we have the elementary inequality

$$\begin{aligned} \mathbb{P}(n^{-1} |\beta_S^{*\top} \mathbf{X}_S^\top \mathbf{Y} - c_0| \|\mathbf{X}_S \beta_S^*\|_2^2 \geq t) \\ \leq \mathbb{P}(|n^{-1} \beta_S^{*\top} \mathbf{X}_S^\top \mathbf{Y} - c_0| \geq t/2) \\ + \mathbb{P}(|n^{-1} \|\mathbf{X}_S \beta_S^*\|_2^2 - 1| \geq t/(2c_0)), \end{aligned}$$

By Chebyshev's inequality

$$\mathbb{P}(|n^{-1} \beta_S^{*\top} \mathbf{X}_S^\top \mathbf{Y} - c_0| \geq t/2) \leq \frac{4\gamma^2}{nt^2}, \quad (\text{B.6})$$

Setting  $t = 2\gamma\sqrt{\frac{\log p}{n}}$  bounds the above probability by  $(\log p)^{-1}$ . By Lemma 1 of [Laurent and Massart \[2000\]](#)

$$\begin{aligned} \mathbb{P}(|n^{-1} \|\mathbf{X}_S \beta_S^*\|_2^2 - 1| \geq t/(2c_0)) \\ \leq 2 \exp(-n \frac{t}{8|c_0|} \wedge \frac{t^2}{64c_0^2}), \end{aligned}$$

Setting  $t = 8|c_0|\sqrt{\frac{\log p}{n}}$  bounds the above probability by  $2p^{-1}$ . We conclude that with probability at least  $1 - 2p^{-1} - (\log p)^{-1} - \frac{\theta^2}{n\xi^4}$

$$n^{-1} \|\mathbf{w}^\top \mathbf{X}_S\|_\infty \leq \bar{C} \sqrt{\frac{\log p}{n}}, \quad (\text{B.7})$$

where  $\bar{C}(\bar{c}_0, c_0, \gamma, \xi) = 8|c_0| + 2\gamma + \bar{c}_0\xi$  and  $\bar{c}_0 = \sqrt{2/\bar{c}}$  is a universal constant.

Going back to (B.4) we have established that with high probability

$$\begin{aligned} &\frac{1}{2n} \|\mathbf{X}_S(c_0 \beta_S^* - \tilde{\beta}_S)\|_2^2 \\ &\leq \bar{C} \sqrt{\frac{\log p}{n}} \|c_0 \beta_S^* - \tilde{\beta}_S\|_1 + \lambda(\|c_0 \beta_S^*\|_1 - \|\tilde{\beta}_S\|_1) \\ &\leq (\bar{C} n_{p,s}^{-\frac{1}{2}} + \sqrt{s}\lambda) \|c_0 \beta_S^* - \tilde{\beta}_S\|_2, \end{aligned}$$

where the inequality  $\|\mathbf{v}\|_1 \leq \sqrt{s}\|\mathbf{v}\|_2$  for  $\mathbf{v} \in \mathbb{R}^s$ . Corollary 5.35 of [Vershynin \[2012\]](#) guarantees that

$$\frac{\lambda_{\min}(\mathbf{X}_S^\top \mathbf{X}_S)}{n} \geq \frac{(\sqrt{n} - 2\sqrt{s})^2}{n},$$

with probability at least  $1 - 2e^{-s/2}$ . Hence, when the above two events happen (with probability at least  $1 - 2p^{-1} - (\log p)^{-1} - 2e^{-s/2} - \frac{\theta^2}{n\xi^4}$ ) we have

$$\|c_0 \beta_S^* - \tilde{\beta}_S\|_2 \leq (\bar{C} n_{p,s}^{-\frac{1}{2}} + \sqrt{s}\lambda) \frac{n}{(\sqrt{n} - 2\sqrt{s})^2}. \quad (\text{B.8})$$

Denote the RHS of (B.8) with  $R$  for brevity. We have  $c_0 - R \leq \|\tilde{\beta}\|_2 \leq c_0 + R$ .

$$\begin{aligned} \left\| \beta_S^* - \frac{\tilde{\beta}_S}{\|\tilde{\beta}_S\|_2} \right\|_2 &\leq \left\| \frac{c_0 \beta_S^* - \tilde{\beta}_S}{\|\tilde{\beta}_S\|_2} \right\|_2 + \frac{|c_0 - \|\tilde{\beta}_S\|_2|}{\|\tilde{\beta}_S\|_2} \\ &\leq 2 \frac{R}{c_0 - R}. \end{aligned}$$

□

*Proof of Theorem 3.2.* Using Theorem 2.3 with a vector  $\mathbf{u}$  with components  $u_i = f(\mathbf{X}_{\pi_i}^\top \hat{\beta})$ , we have with probability at least  $1 - \exp(-x)$ :

$$\begin{aligned} &\frac{1}{n} \sum_{i=n+1}^{2n} (f(\mathbf{X}_i^\top \beta^*) - \hat{f}(\mathbf{X}_i^\top \hat{\beta}))^2 \\ &\leq \frac{1}{n} \sum_{i=1}^n (f(\mathbf{X}_{\pi_i}^\top \beta^*) - f(\mathbf{X}_{\pi_i}^\top \hat{\beta}))^2 + \frac{C2^{2/3}}{n^{2/3}} + \frac{4x}{n} \\ &\leq L^2 (\hat{\beta} - \beta^*)^\top \hat{\Sigma} (\hat{\beta} - \beta^*) + \frac{C2^{2/3}}{n^{2/3}} + \frac{4x}{n}, \end{aligned}$$

where  $\hat{\Sigma} = \frac{1}{n} \sum_{i=n+1}^{2n} \mathbf{X}_i \mathbf{X}_i^\top$ . By Lemma B.2 we know that the vector  $\hat{\beta} - \beta^*$  is  $s$ -sparse, and therefore by Corollary 5.35 of [Vershynin \[2012\]](#) we have

$$\begin{aligned} (\hat{\beta} - \beta^*)^\top \hat{\Sigma} (\hat{\beta} - \beta^*) &\leq (1 + \sqrt{s/n} + \sqrt{x/n})^2 \|\hat{\beta} - \beta^*\|_2^2 \\ &\lesssim (\sqrt{s}\lambda + n_{p,s}^{-\frac{1}{2}})^2, \end{aligned}$$

with probability at least  $1 - \exp(-x)$ , where in the last inequality we used Lemma B.2 once again. This completes the proof. □
